# Supplementary material for: Pet and owner personality and mental wellbeing associate with attachment to cats and dogs
Source: PubMed Central journal article supplement (PMC10709106; doi:10.1016/j.isci.2023.108423), 2023-11-09
Supplement: mmc1.pdf [file mmc1.pdf]

iScience, Volume 26

## **Supplemental information**

### **Pet and owner personality and mental wellbeing associate with attachment to cats and dogs**

**Aada Ståhl, Milla Salonen, Emma Hakanen, Salla Mikkola, Sini Sulkama, Jari Lahti, and Hannes Lohi**

**Supplementary Table S1.** Descriptive statistics of categorical variables, Related to STAR Methods.

| Variable                     | Level                 | Dogs |       | Cats |       |
|------------------------------|-----------------------|------|-------|------|-------|
|                              |                       | N    | %     | N    | %     |
| Gender of the owner          | Women                 | 2359 | 92.69 | 719  | 91.24 |
|                              | Men/other/did not say | 186  | 7.31  | 69   | 8.76  |
| Age of the owner             | 1 = under 25          | 143  | 5.62  | 48   | 6.09  |
|                              | 2 = 25-29 years       | 349  | 13.71 | 130  | 16.50 |
|                              | 3 = 30-34 years       | 332  | 13.05 | 113  | 14.34 |
|                              | 4 = 35-39 years       | 309  | 12.14 | 92   | 11.68 |
|                              | 5 = 40-44 years       | 322  | 12.65 | 91   | 11.55 |
|                              | 6 = 45-49 years       | 261  | 10.26 | 90   | 11.42 |
|                              | 7 = 50-54 years       | 272  | 10.69 | 70   | 8.88  |
|                              | 8 = 55-59 years       | 219  | 8.61  | 50   | 6.35  |
|                              | 9 = over 60           | 240  | 9.43  | 63   | 8.00  |
|                              | Unknown/ did not say  | 98   | 3.85  | 41   | 5.23  |
| Parental status of the owner | No children           | 1861 | 73.12 | 589  | 74.75 |
|                              | Children              | 565  | 22.20 | 92   | 11.68 |
|                              | Missing               | 119  | 4.68  | 107  | 13.58 |

**Supplementary Table S2.** Descriptive statistics of continuous variables, species = dogs, Related to STAR Methods.

| Category                    | Variable                    | Range   | Mean  | SD    | % Missing |
|-----------------------------|-----------------------------|---------|-------|-------|-----------|
| Attachment insecurity       | Avoidance trait             | 13 - 69 | 19.49 | 7.00  | 12.81     |
|                             | Anxiety trait               | 13 - 77 | 30.00 | 10.56 | 12.81     |
| Attachment insecurity items | Avoid1 (originally: 1[1])   | 1 - 7   | 1.29  | 0.87  | 12.85     |
|                             | Anx1 (originally: 2[1])     | 1 - 7   | 5.27  | 1.71  | 12.81     |
|                             | Avoid2 (originally: 3[1])   | 1 - 7   | 1.41  | 0.93  | 12.81     |
|                             | Anx2 (originally: 4[1])     | 1 - 7   | 1.94  | 1.42  | 12.81     |
|                             | Avoid3 (originally: 5[1])   | 1 - 7   | 1.61  | 1.13  | 12.85     |
|                             | Anx3 (originally: 6[1])     | 1 - 7   | 1.44  | 0.93  | 12.85     |
|                             | Avoid4 (originally: 7[1])   | 1 - 7   | 1.94  | 1.30  | 12.85     |
|                             | Anx4 (originally: 8[1])     | 1 - 7   | 4.34  | 1.90  | 12.85     |
|                             | Avoid5 (originally: 9[1])   | 1 - 7   | 1.34  | 0.85  | 12.81     |
|                             | Anx5 (originally: 10[1])    | 1 - 7   | 1.67  | 1.28  | 12.81     |
|                             | Avoid6 (originally: 11[1])  | 1 - 7   | 1.15  | 0.59  | 12.85     |
|                             | Anx6 (originally: 12[1])    | 1 - 6   | 1.18  | 0.60  | 12.81     |
|                             | Avoid7 (originally: 13[1])  | 1 - 7   | 1.23  | 0.74  | 12.81     |
|                             | Anx7 (originally: 14[1])    | 1 - 7   | 1.44  | 0.95  | 12.85     |
|                             | Avoid8 (originally: 15[1])  | 1 - 7   | 2.49  | 1.60  | 12.81     |
|                             | Anx8 (originally: 16[1])    | 1 - 7   | 2.49  | 1.77  | 12.85     |
|                             | Avoid9 (originally: 17[1])  | 1 - 7   | 1.29  | 0.75  | 12.81     |
|                             | Anx9 (originally: 18[1])    | 1 - 7   | 1.81  | 1.33  | 12.93     |
|                             | Avoid10 (originally: 19[1]) | 1 - 6   | 1.32  | 0.77  | 12.81     |

|                                  |                                    |               |       |      |       |
|----------------------------------|------------------------------------|---------------|-------|------|-------|
|                                  | Anx10 (originally: 20[1])          | 1 - 7         | 1.84  | 1.37 | 12.85 |
|                                  | Avoid11 (originally: 21[1])        | 1 - 7         | 1.30  | 0.87 | 12.85 |
|                                  | Anx11 (originally: 22[1])          | 1 - 7         | 2.87  | 1.98 | 12.89 |
|                                  | Avoid12 (originally: 23[1])        | 1 - 7         | 1.26  | 0.78 | 12.81 |
|                                  | Anx12 (originally: 24[1])          | 1 - 7         | 2.07  | 1.55 | 12.85 |
|                                  | Avoid13 (originally: 25[1])        | 1 - 7         | 1.87  | 1.23 | 12.81 |
|                                  | Anx13 (originally: 26[1])          | 1 - 7         | 1.63  | 1.16 | 12.81 |
| Dog personality trait            | Insecurity score                   | -1.58 - 3.49  | 0.04  | 1.00 | 1.81  |
|                                  | Training focus score               | -4.21 - 2.48  | 0.02  | 1.00 | 1.81  |
|                                  | Energy score                       | -3.88 - 2.08  | 0.04  | 1.00 | 1.81  |
|                                  | Aggressiveness/ dominance score    | -1.56 - 3.78  | -0.01 | 1.00 | 1.81  |
|                                  | Human sociability score            | -4.91 - 1.65  | 0.03  | 0.97 | 1.81  |
|                                  | Dog sociability score              | -3.08 - 1.96  | 0.03  | 1.01 | 1.81  |
|                                  | Perseverance score                 | -4.16 - 3.69  | -0.02 | 1.00 | 1.81  |
| Dog unwanted behaviour trait     | Noise sensitivity score            | -1.03 - 7.36  | 0.03  | 1.18 | 15.60 |
|                                  | Fearfulness score                  | -1.51 - 4.50  | 0.07  | 1.08 | 8.57  |
|                                  | Barking score                      | -1.36 - 4.61  | 0.00  | 1.00 | 8.57  |
|                                  | Stranger directed aggression score | -1.11 - 7.67  | 0.00  | 0.95 | 8.57  |
|                                  | Owner directed aggression score    | -0.93 - 8.82  | 0.00  | 0.96 | 8.57  |
|                                  | Dog directed aggression score      | -1.99 - 4.18  | -0.02 | 0.99 | 8.57  |
|                                  | Fear of surfaces/ heights score    | -0.69 - 6.20  | 0.03  | 1.09 | 18.62 |
|                                  | Separation-related behaviour score | -0.63 - 12.81 | -0.02 | 1.07 | 14.77 |
|                                  | Inattention score                  | -1.74 - 4.33  | 0.00  | 0.96 | 9.98  |
| Hyperactivity/ impulsivity score | -1.65 - 4.75                       | 0.02          | 0.99  | 9.98 |       |
| Owner personality trait          | Agreeableness score                | -2.58 - 2.83  | 1.25  | 0.70 | 3.81  |
|                                  | Conscientiousness score            | -1.83 - 2.92  | 1.13  | 0.82 | 3.81  |
|                                  | Extraversion score                 | -2.75 - 2.75  | 0.14  | 0.96 | 3.81  |
|                                  | Neuroticism score                  | -2.92 - 2.83  | -0.65 | 1.11 | 3.81  |
|                                  | Openness score                     | -1.83 - 3.00  | 1.01  | 0.85 | 3.81  |
| Owner well-being trait           | Life satisfaction score            | 5 - 35        | 24.63 | 5.93 | 29.27 |
|                                  | Perceived stress score             | 0 - 39        | 12.50 | 7.20 | 29.27 |
|                                  | Wellbeing score                    | 8 - 35        | 26.53 | 4.24 | 29.27 |
|                                  | Depressive symptoms score          | 0 - 30        | 6.92  | 5.64 | 29.27 |
|                                  | Anxiety symptoms score             | 0 - 21        | 4.33  | 4.16 | 29.27 |

[1] Zilcha-Mano, S., Mikulincer, M., & Shaver, P. R. (2011). An attachment perspective on human–pet relationships: Conceptualization and assessment of pet attachment orientations. *Journal of Research in Personality*, 45(4), 345-357.

**Supplementary Table S3.** Descriptive statistics of continuous variables, species = cats, Related to STAR Methods.

| Category                     | Variable                | Range        | Mean  | SD    | % Missing |
|------------------------------|-------------------------|--------------|-------|-------|-----------|
| Attachment insecurity        | Avoidance               | 13 - 60      | 17.97 | 5.09  | 12.69     |
|                              | Anxiety                 | 13 - 79      | 31.98 | 11.29 | 12.69     |
| Attachment insecurity items  | Avoid1                  | 1 - 7        | 1.22  | 0.87  | 12.69     |
|                              | Anx1                    | 1 - 7        | 5.33  | 1.76  | 12.82     |
|                              | Avoid2                  | 1 - 7        | 1.21  | 0.71  | 12.69     |
|                              | Anx2                    | 1 - 7        | 2.21  | 1.54  | 12.69     |
|                              | Avoid3                  | 1 - 7        | 1.39  | 0.86  | 12.69     |
|                              | Anx3                    | 1 - 6        | 1.26  | 0.69  | 12.69     |
|                              | Avoid4                  | 1 - 7        | 1.86  | 1.15  | 12.69     |
|                              | Anx4                    | 1 - 7        | 4.62  | 1.89  | 12.69     |
|                              | Avoid5                  | 1 - 5        | 1.40  | 0.86  | 12.69     |
|                              | Anx5                    | 1 - 7        | 2.15  | 1.61  | 12.69     |
|                              | Avoid6                  | 1 - 7        | 1.12  | 0.54  | 12.82     |
|                              | Anx6                    | 1 - 7        | 1.19  | 0.66  | 12.69     |
|                              | Avoid7                  | 1 - 6        | 1.16  | 0.55  | 12.69     |
|                              | Anx7                    | 1 - 7        | 1.62  | 1.10  | 12.69     |
|                              | Avoid8                  | 1 - 7        | 2.19  | 1.43  | 12.69     |
|                              | Anx8                    | 1 - 7        | 2.71  | 1.85  | 12.69     |
|                              | Avoid9                  | 1 - 7        | 1.21  | 0.66  | 12.82     |
|                              | Anx9                    | 1 - 7        | 1.69  | 1.18  | 12.69     |
|                              | Avoid10                 | 1 - 7        | 1.19  | 0.60  | 12.69     |
|                              | Anx10                   | 1 - 7        | 2.00  | 1.48  | 12.69     |
|                              | Avoid11                 | 1 - 6        | 1.17  | 0.58  | 12.69     |
|                              | Anx11                   | 1 - 7        | 3.05  | 2.04  | 12.69     |
|                              | Avoid12                 | 1 - 5        | 1.12  | 0.45  | 12.69     |
|                              | Anx12                   | 1 - 7        | 2.37  | 1.73  | 12.69     |
|                              | Avoid13                 | 1 - 6        | 1.71  | 1.03  | 12.69     |
|                              | Anx13                   | 1 - 7        | 1.80  | 1.28  | 12.69     |
| Cat personality trait        | Fearfulness             | -1.68 - 3.89 | 0.12  | 0.98  | 0.00      |
|                              | Activity/playfulness    | -3.67 - 2.51 | 0.00  | 0.97  | 0.00      |
|                              | Human aggression        | -1.09 - 4.73 | -0.08 | 0.86  | 0.00      |
|                              | Human sociability       | -3.82 - 2.73 | 0.01  | 0.98  | 0.00      |
|                              | Sociability toward cats | -4.46 - 2.10 | 0.02  | 0.94  | 0.00      |
| Cat unwanted behaviour trait | Excessive grooming      | -1.23 - 6.95 | 0.00  | 0.99  | 0.00      |
|                              | Litterbox issues        | -1.33 - 4.33 | -0.05 | 0.93  | 0.00      |
| Human personality trait      | Agreeableness score     | -1.63 - 2.83 | 1.22  | 0.72  | 5.20      |
|                              | Conscientiousness score | -2.00 - 2.92 | 1.02  | 0.88  | 5.20      |
|                              | Extraversion score      | -2.42 - 2.50 | -0.08 | 0.95  | 5.20      |
|                              | Neuroticism score       | -2.83 - 2.25 | -0.32 | 1.12  | 5.20      |
|                              | Openness score          | -1.50 - 2.92 | 1.18  | 0.84  | 5.20      |

|                        |                           |         |       |      |       |
|------------------------|---------------------------|---------|-------|------|-------|
| Owner well-being trait | Life satisfaction score   | 5 - 35  | 23.23 | 6.53 | 33.00 |
|                        | Perceived stress score    | 1 - 33  | 13.63 | 7.18 | 33.00 |
|                        | Wellbeing score           | 12 - 35 | 25.71 | 4.33 | 33.00 |
|                        | Depressive symptoms score | 0 - 30  | 7.93  | 6.00 | 33.00 |
|                        | Anxiety symptoms score    | 0 - 21  | 5.01  | 4.43 | 33.12 |

**Supplementary Table S4.** Model fit of competing SEM models. CFI = comparative fit index, TLI = Tucker-Lewis index, RMSEA = root mean square error of approximation, SRMR = standardized root mean square residual, Related to STAR Methods.

| Competing model | Dogs  |       |       |       | Cats  |       |       |       |
|-----------------|-------|-------|-------|-------|-------|-------|-------|-------|
|                 | CFI   | TLI   | RMSEA | SRMR  | CFI   | TLI   | RMSEA | SRMR  |
| Model 1         | 0.907 | 0.884 | 0.050 | 0.065 | 0.881 | 0.842 | 0.060 | 0.060 |
| Model 2         | 0.763 | 0.744 | 0.055 | 0.071 | 0.669 | 0.640 | 0.068 | 0.082 |
| Model 3         | 0.903 | 0.882 | 0.051 | 0.067 | 0.883 | 0.848 | 0.061 | 0.060 |
| Model 4         | 0.761 | 0.744 | 0.055 | 0.071 | 0.669 | 0.642 | 0.069 | 0.082 |
| Model 5         | 0.866 | 0.829 | 0.061 | 0.078 | 0.819 | 0.752 | 0.076 | 0.076 |
| Model 6         | 0.743 | 0.722 | 0.057 | 0.074 | 0.644 | 0.611 | 0.071 | 0.085 |
| Model 7         | 0.862 | 0.829 | 0.061 | 0.079 | 0.820 | 0.758 | 0.077 | 0.077 |
| Model 8         | 0.741 | 0.722 | 0.057 | 0.075 | 0.644 | 0.613 | 0.072 | 0.086 |

Model 1: one latent well-being trait, attachment anxiety and avoidance as scales, more personality traits

Model 2: one latent well-being trait, attachment anxiety and avoidance as latent traits, more personality traits

Model 3: one latent well-being trait, attachment anxiety and avoidance as scales, less personality traits

Model 4: one latent well-being trait, attachment anxiety and avoidance as latent traits, less personality traits

Model 5: two latent well-being traits, attachment anxiety and avoidance as scales, more personality traits

Model 6: two latent well-being traits, attachment anxiety and avoidance as latent traits, more personality traits

Model 7: two latent well-being traits, attachment anxiety and avoidance as scales, less personality traits

Model 8: two latent well-being traits, attachment anxiety and avoidance as latent traits, less personality traits

**Supplementary Table S5.** Unstandardized estimates, standardized estimates, Z-scores, P-values, and 95% confidence limits (CL, for standardized estimates) for the regressions of the SEM model for dog owners, Related to STAR Methods. All P-values are corrected for false discovery rate (FDR). Significant (<0.05) P-values are in bold. CL = confidence limit.

| Outcome variable     | Explanatory variable      | Unstandardized estimate | Standardized estimate | Z-score | P-value          | Lower 95% CL | Upper 95% CL |
|----------------------|---------------------------|-------------------------|-----------------------|---------|------------------|--------------|--------------|
| Attachment avoidance | Agreeableness             | -0.120                  | -0.085                | -3.43   | <b>0.002</b>     | -0.134       | -0.036       |
|                      | Conscientiousness         | -0.072                  | -0.059                | -2.05   | 0.060            | -0.116       | -0.002       |
|                      | Extraversion              | -0.065                  | -0.062                | -2.39   | <b>0.026</b>     | -0.113       | -0.011       |
|                      | Neuroticism               | -0.078                  | -0.085                | -2.18   | <b>0.045</b>     | -0.162       | -0.008       |
|                      | Openness                  | -0.016                  | -0.014                | -0.56   | 0.661            | -0.062       | 0.034        |
|                      | Fear-aggression           | -0.074                  | -0.037                | -1.14   | 0.320            | -0.101       | 0.027        |
|                      | Aggression                | 0.356                   | 0.158                 | 2.74    | <b>0.010</b>     | 0.045        | 0.272        |
|                      | Impulsivity/inattention   | 0.341                   | 0.203                 | 6.48    | <b>&lt;0.001</b> | 0.141        | 0.264        |
|                      | Owner's gender            | -0.188                  | -0.050                | -2.04   | 0.060            | -0.097       | -0.002       |
|                      | Owner's age group         | -0.017                  | -0.043                | -1.87   | 0.087            | -0.087       | 0.002        |
|                      | Children in the household | 0.244                   | 0.104                 | 4.79    | <b>&lt;0.001</b> | 0.062        | 0.147        |
|                      | Total wellbeing           | -0.030                  | -0.122                | -2.97   | <b>0.005</b>     | -0.202       | -0.041       |
|                      | Dog's human sociability   | -0.113                  | -0.112                | -4.84   | <b>&lt;0.001</b> | -0.157       | -0.066       |
| Attachment anxiety   | Agreeableness             | -0.027                  | -0.019                | -0.92   | 0.434            | -0.061       | 0.022        |
|                      | Conscientiousness         | -0.014                  | -0.011                | -0.50   | 0.698            | -0.055       | 0.033        |
|                      | Extraversion              | -0.015                  | -0.014                | -0.67   | 0.587            | -0.057       | 0.028        |
|                      | Neuroticism               | 0.228                   | 0.251                 | 6.63    | <b>&lt;0.001</b> | 0.176        | 0.325        |
|                      | Fear-aggression           | -0.038                  | -0.019                | -0.89   | 0.452            | -0.061       | 0.023        |
|                      | Fear-related behavior     | 0.103                   | 0.068                 | 2.39    | <b>0.026</b>     | 0.012        | 0.124        |
|                      | Owner's gender            | 0.005                   | 0.001                 | 0.07    | 0.951            | -0.037       | 0.040        |
|                      | Owner's age group         | -0.009                  | -0.021                | -1.02   | 0.386            | -0.063       | 0.020        |
|                      | Children in the household | -0.290                  | -0.124                | -6.45   | <b>&lt;0.001</b> | -0.162       | -0.086       |
|                      | Total wellbeing           | -0.045                  | -0.182                | -4.90   | <b>&lt;0.001</b> | -0.255       | -0.109       |
|                      |                           | Dog's perseverance      | 0.042                 | 0.042   | 2.11             | 0.052        | 0.003        |
| Total wellbeing      | Neuroticism               | -2.714                  | -0.734                | -48.14  | <b>&lt;0.001</b> | -0.764       | -0.704       |
|                      | Extraversion              | -0.002                  | -0.001                | -0.03   | 0.979            | -0.040       | 0.039        |
| Neuroticism          | Owner's gender            | 0.215                   | 0.052                 | 2.49    | <b>0.021</b>     | 0.011        | 0.092        |
|                      | Owner's age group         | -0.154                  | -0.343                | -21.30  | <b>&lt;0.001</b> | -0.375       | -0.311       |
| Agreeableness        | Owner's gender            | 0.301                   | 0.111                 | 4.50    | <b>&lt;0.001</b> | 0.063        | 0.160        |
|                      | Owner's age group         | 0.036                   | 0.124                 | 6.46    | <b>&lt;0.001</b> | 0.087        | 0.162        |
| Conscientiousness    | Owner's age group         | 0.048                   | 0.141                 | 7.24    | <b>&lt;0.001</b> | 0.103        | 0.180        |

**Supplementary Table S6.** Unstandardized estimates, standardized estimates, Z-scores, P-values, and 95% confidence limits (CL, for standardized estimates) for the regressions of the SEM model for cat owners, Related to STAR Methods. All P-values are corrected for false discovery rate (FDR). Significant (<0.05) P-values are in bold. CL = confidence limit.

| Outcome variable     | Explanatory variable       | Unstandardized estimate | Standardized estimate | Z-score | P-value          | Lower 95% CL | Upper 95% CL |
|----------------------|----------------------------|-------------------------|-----------------------|---------|------------------|--------------|--------------|
| Attachment avoidance | Agreeableness              | -0.098                  | -0.071                | -1.89   | 0.084            | -0.144       | 0.003        |
|                      | Conscientiousness          | -0.087                  | -0.077                | -1.83   | 0.093            | -0.159       | 0.005        |
|                      | Extraversion               | -0.018                  | -0.017                | -0.41   | 0.754            | -0.096       | 0.063        |
|                      | Neuroticism                | -0.086                  | -0.095                | -1.43   | 0.198            | -0.226       | 0.035        |
|                      | Openness                   | 0.011                   | 0.009                 | 0.23    | 0.878            | -0.069       | 0.087        |
|                      | Cat's fearfulness          | 0.013                   | 0.013                 | 0.32    | 0.823            | -0.065       | 0.091        |
|                      | Cat's human aggression     | 0.044                   | 0.038                 | 1.01    | 0.387            | -0.035       | 0.110        |
|                      | Cat's activity/playfulness | -0.061                  | -0.059                | -1.40   | 0.208            | -0.141       | 0.023        |
|                      | Cat's cat sociability      | -0.003                  | -0.003                | -0.09   | 0.945            | -0.072       | 0.065        |
|                      | Cat's human sociability    | -0.098                  | -0.096                | -2.54   | <b>0.018</b>     | -0.170       | -0.022       |
|                      | Cat's litterbox issues     | 0.041                   | 0.038                 | 0.83    | 0.485            | -0.052       | 0.129        |
|                      | Cat's excessive grooming   | 0.034                   | 0.034                 | 0.64    | 0.609            | -0.071       | 0.139        |
|                      | Owner's gender             | -0.043                  | -0.012                | -0.31   | 0.832            | -0.090       | 0.065        |
|                      | Owner's age group          | 0.005                   | 0.013                 | 0.29    | 0.839            | -0.073       | 0.099        |
|                      | Children in the household  | 0.228                   | 0.078                 | 1.66    | 0.131            | -0.014       | 0.171        |
| Total wellbeing      | -0.026                     | -0.122                  | -1.74                 | 0.111   | -0.259           | 0.015        |              |
| Attachment anxiety   | Agreeableness              | -0.021                  | -0.015                | -0.47   | 0.716            | -0.080       | 0.049        |
|                      | Conscientiousness          | 0.102                   | 0.091                 | 2.28    | <b>0.036</b>     | 0.013        | 0.168        |
|                      | Extraversion               | 0.074                   | 0.069                 | 1.92    | 0.079            | -0.001       | 0.140        |
|                      | Neuroticism                | 0.343                   | 0.380                 | 6.34    | <b>&lt;0.001</b> | 0.263        | 0.498        |
|                      | Cat's fearfulness          | 0.065                   | 0.064                 | 1.93    | 0.078            | -0.001       | 0.129        |
|                      | Cat's human aggression     | 0.063                   | 0.054                 | 1.72    | 0.116            | -0.008       | 0.116        |
|                      | Cat's activity/playfulness | 0.090                   | 0.088                 | 2.63    | <b>0.015</b>     | 0.022        | 0.153        |
|                      | Cat's cat sociability      | -0.060                  | -0.057                | -1.50   | 0.176            | -0.131       | 0.018        |
|                      | Cat's human sociability    | -0.009                  | -0.008                | -0.26   | 0.859            | -0.071       | 0.054        |
|                      | Cat's litterbox issues     | 0.057                   | 0.053                 | 1.64    | 0.136            | -0.010       | 0.116        |
|                      | Cat's excessive grooming   | -0.005                  | -0.005                | -0.16   | 0.913            | -0.070       | 0.060        |
|                      | Owner's gender             | -0.117                  | -0.033                | -0.97   | 0.411            | -0.101       | 0.034        |
|                      | Owner's age group          | 0.001                   | 0.001                 | 0.04    | 0.973            | -0.071       | 0.074        |
|                      | Children in the household  | -0.312                  | -0.108                | -3.24   | <b>0.002</b>     | -0.173       | -0.043       |
|                      | Total wellbeing            | -0.062                  | -0.287                | -4.69   | <b>&lt;0.001</b> | -0.408       | -0.167       |
| Total wellbeing      | Neuroticism                | -3.087                  | -0.738                | -33.40  | <b>&lt;0.001</b> | -0.781       | -0.694       |
|                      | Extraversion               | 0.023                   | 0.005                 | 0.15    | 0.917            | -0.059       | 0.068        |
| Neuroticism          | Owner's gender             | 0.326                   | 0.084                 | 1.95    | 0.076            | -0.001       | 0.168        |
|                      | Owner's age group          | -0.193                  | -0.417                | -15.19  | <b>&lt;0.001</b> | -0.470       | -0.363       |
| Agreeableness        | Owner's gender             | 0.234                   | 0.092                 | 1.87    | 0.087            | -0.005       | 0.190        |
|                      | Owner's age group          | 0.005                   | 0.018                 | 0.49    | 0.707            | -0.054       | 0.089        |

|                   |                   |       |       |      |                |       |       |
|-------------------|-------------------|-------|-------|------|----------------|-------|-------|
| Conscientiousness | Owner's age group | 0.097 | 0.262 | 7.84 | < <b>0.001</b> | 0.197 | 0.328 |
|-------------------|-------------------|-------|-------|------|----------------|-------|-------|

**Supplementary Table S7.** Unstandardized estimates, standardized estimates, Z-scores, P-values, and 95% confidence limits (CL, for standardized estimates) for the covariances of the SEM model for dog owners, Related to STAR Methods. All P-values are corrected for false discovery rate (FDR). Significant (<0.05) P-values are in bold. CL = confidence limit.

| Variable 1                | Variable 2              | Unstand-<br>ardized<br>estimate | Stand-<br>ardized<br>estimate | Z-score | P-value        | Lower<br>95%<br>CL | Upper<br>95 %<br>CL |
|---------------------------|-------------------------|---------------------------------|-------------------------------|---------|----------------|--------------------|---------------------|
| Total well-being          | Owner's gender          | 0.018                           | 0.025                         | 0.90    | 0.445          | -0.029             | 0.080               |
| Fear-aggression           | Aggression              | 0.113                           | 0.511                         | 13.03   | < <b>0.001</b> | 0.434              | 0.588               |
|                           | Fear-related behaviour  | 0.072                           | 0.221                         | 5.73    | < <b>0.001</b> | 0.146              | 0.297               |
|                           | Impulsivity/inattention | 0.056                           | 0.19                          | 8.82    | < <b>0.001</b> | 0.148              | 0.232               |
| Fear-related<br>behaviour | Impulsivity/inattention | 0.112                           | 0.293                         | 5.59    | < <b>0.001</b> | 0.190              | 0.396               |
|                           | Aggression              | 0.092                           | 0.318                         | 5.82    | < <b>0.001</b> | 0.211              | 0.425               |
| Aggression                | Impulsivity/inattention | 0.080                           | 0.308                         | 8.85    | < <b>0.001</b> | 0.240              | 0.377               |
| Neuroticism               | Conscientiousness       | -0.399                          | -0.484                        | -29.63  | < <b>0.001</b> | -0.516             | -0.452              |
|                           | Extraversion            | -0.414                          | -0.427                        | -25.18  | < <b>0.001</b> | -0.460             | -0.393              |
|                           | Agreeableness           | -0.048                          | -0.068                        | -3.48   | <b>0.002</b>   | -0.107             | -0.030              |
| Openness                  | Extraversion            | 0.259                           | 0.325                         | 19.61   | < <b>0.001</b> | 0.292              | 0.357               |
|                           | Agreeableness           | 0.156                           | 0.269                         | 13.90   | < <b>0.001</b> | 0.231              | 0.307               |
| Conscientiousness         | Extraversion            | 0.155                           | 0.201                         | 10.75   | < <b>0.001</b> | 0.165              | 0.238               |



**Supplementary Table S8.** Unstandardized estimates, standardized estimates, Z-scores, P-values, and 95% confidence limits (CL, for standardized estimates) for the covariances of the SEM model for cat owners, Related to STAR Methods. All P-values are corrected for false discovery rate (FDR). Significant (<0.05) P-values are in bold. CL = confidence limit.

| Variable 1                     | Variable 2                  | Unstand-ardized estimate | Stand-ardized estimate | Z-score | P-value          | Lower 95% CL | Upper 95 % CL |
|--------------------------------|-----------------------------|--------------------------|------------------------|---------|------------------|--------------|---------------|
| Total wellbeing                | Owner's gender              | 0.044                    | 0.050                  | 0.75    | 0.532            | -0.081       | 0.181         |
| Neuroticism                    | Conscientiousness           | -0.382                   | -0.451                 | -14.22  | <b>&lt;0.001</b> | -0.514       | -0.389        |
|                                | Extraversion                | -0.352                   | -0.377                 | -11.88  | <b>&lt;0.001</b> | -0.440       | -0.315        |
|                                | Agreeableness               | -0.057                   | -0.080                 | -2.26   | <b>0.037</b>     | -0.150       | -0.011        |
| Extraversion                   | Openness                    | 0.253                    | 0.324                  | 10.29   | <b>&lt;0.001</b> | 0.263        | 0.386         |
| Conscientiousness              | Extraversion                | 0.118                    | 0.148                  | 4.35    | <b>&lt;0.001</b> | 0.081        | 0.215         |
| Agreeableness                  | Openness                    | 0.151                    | 0.254                  | 6.65    | <b>&lt;0.001</b> | 0.179        | 0.329         |
| Cat's activity/<br>playfulness | Cat's cat sociability       | 0.255                    | 0.282                  | 8.52    | <b>&lt;0.001</b> | 0.217        | 0.347         |
| Cat's human<br>aggression      | Cat's cat sociability       | -0.182                   | -0.227                 | -5.15   | <b>&lt;0.001</b> | -0.313       | -0.140        |
| Cat's cat sociability          | Cat's litterbox issues      | -0.070                   | -0.081                 | -1.91   | 0.081            | -0.164       | 0.002         |
| Cat's activity<br>playfulness  | Cat's human<br>sociability  | 0.198                    | 0.210                  | 6.30    | <b>&lt;0.001</b> | 0.145        | 0.276         |
| Cat's fearfulness              | Cat's human<br>sociability  | -0.168                   | -0.176                 | -5.26   | <b>&lt;0.001</b> | -0.242       | -0.110        |
|                                | Cat's human<br>aggression   | 0.209                    | 0.250                  | 7.20    | <b>&lt;0.001</b> | 0.182        | 0.318         |
| Cat's litterbox<br>issues      | Cat's excessive<br>grooming | 0.176                    | 0.193                  | 6.03    | <b>&lt;0.001</b> | 0.130        | 0.256         |

**Supplementary Table S9.** Unstandardized estimates, standardized estimates, Z-scores, P-values, and 95% confidence limits (CL, for standardized estimates) for the latent variables of the SEM model for dog owners, Related to STAR Methods. All P-values are corrected for false discovery rate (FDR). Significant (<0.05) P-values are in bold. CL = confidence limit.

| Latent variable         | Observed variable         | Unstandardized estimate | Standardized estimate | Z-score | P-value          | Lower 95% CL | Upper 95% CL |
|-------------------------|---------------------------|-------------------------|-----------------------|---------|------------------|--------------|--------------|
| Total wellbeing         | Life satisfaction         | 1.000                   | 0.682                 | 43.45   | <b>&lt;0.001</b> | 0.651        | 0.713        |
|                         | Perceived stress          | -1.611                  | -0.908                | -148.49 | <b>&lt;0.001</b> | -0.920       | -0.896       |
|                         | Wellbeing                 | 0.885                   | 0.847                 | 96.92   | <b>&lt;0.001</b> | 0.830        | 0.864        |
|                         | CESD-10                   | -1.247                  | -0.898                | -140.40 | <b>&lt;0.001</b> | -0.910       | -0.885       |
|                         | GAD-7                     | -0.844                  | -0.823                | -80.92  | <b>&lt;0.001</b> | -0.843       | -0.803       |
| Fear-aggression         | Dog's fearfulness         | 1.000                   | 0.464                 | 16.82   | <b>&lt;0.001</b> | 0.410        | 0.519        |
|                         | Dog's barking             | 1.991                   | 0.993                 | 30.56   | <b>&lt;0.001</b> | 0.929        | 1.057        |
|                         | Dog's stranger aggression | 0.669                   | 0.353                 | 8.97    | <b>&lt;0.001</b> | 0.276        | 0.430        |
| Fear-related behaviour  | Dog's noise sensitivity   | 1.000                   | 0.557                 | 15.29   | <b>&lt;0.001</b> | 0.485        | 0.628        |
|                         | Dog's separation behavior | 0.511                   | 0.312                 | 5.87    | <b>&lt;0.001</b> | 0.208        | 0.416        |
|                         | Dog's surface phobia      | 0.714                   | 0.428                 | 10.21   | <b>&lt;0.001</b> | 0.346        | 0.510        |
|                         | Dog's fearfulness         | 0.648                   | 0.393                 | 10.63   | <b>&lt;0.001</b> | 0.321        | 0.466        |
| Aggression              | Dog's owner aggression    | 1.000                   | 0.456                 | 10.00   | <b>&lt;0.001</b> | 0.367        | 0.546        |
|                         | Dog's dog aggression      | 1.288                   | 0.574                 | 16.16   | <b>&lt;0.001</b> | 0.505        | 0.644        |
|                         | Dog's stranger aggression | 1.003                   | 0.465                 | 9.17    | <b>&lt;0.001</b> | 0.365        | 0.564        |
| Impulsivity/inattention | Dog's inattention         | 1.000                   | 0.611                 | 17.65   | <b>&lt;0.001</b> | 0.543        | 0.679        |
|                         | Dog's impulsivity         | 1.597                   | 0.947                 | 20.76   | <b>&lt;0.001</b> | 0.858        | 1.037        |

**Supplementary Table S10.** Unstandardized estimates, standardized estimates, Z-scores, P-values, and 95% confidence limits (CL, for standardized estimates) for the latent variables of the SEM model for cat owners, Related to STAR Methods. All P-values are corrected for false discovery rate (FDR). Significant (<0.05) P-values are in bold. CL = confidence limit.

| Latent variable | Observed variable | Unstandardized estimate | Standardized estimate | Z-score | P-value          | Lower 95% CL | Upper 95% CL |
|-----------------|-------------------|-------------------------|-----------------------|---------|------------------|--------------|--------------|
| Total wellbeing | Life satisfaction | 1.000                   | 0.713                 | 28.34   | <b>&lt;0.001</b> | 0.663        | 0.762        |
|                 | Perceived stress  | -1.362                  | -0.887                | -72.32  | <b>&lt;0.001</b> | -0.911       | -0.863       |
|                 | Wellbeing         | 0.802                   | 0.866                 | 69.83   | <b>&lt;0.001</b> | 0.842        | 0.891        |
|                 | CESD-10           | -1.163                  | -0.908                | -85.61  | <b>&lt;0.001</b> | -0.929       | -0.887       |
|                 | GAD-7             | -0.768                  | -0.809                | -41.74  | <b>&lt;0.001</b> | -0.847       | -0.771       |

**Supplementary Table S11.** Unstandardized estimates, standardized estimates, Z-scores, P-values, and 95% confidence limits (CL, for standardized estimates) for intercepts and variances of variables of the SEM model for dog owners, Related to STAR Methods. All P-values are corrected for false discovery rate (FDR). Significant (<0.05) P-values are in bold. CL = confidence limit.

| <b>Intercepts</b>         |                                          |                                        |                |                |                             |                              |
|---------------------------|------------------------------------------|----------------------------------------|----------------|----------------|-----------------------------|------------------------------|
| <b>Variable</b>           | <b>Unstand-<br/>ardized<br/>estimate</b> | <b>Stand-<br/>ardized<br/>estimate</b> | <b>Z-score</b> | <b>P-value</b> | <b>Lower<br/>95%<br/>CL</b> | <b>Upper<br/>95 %<br/>CL</b> |
| Life satisfaction         | 22.952                                   | 3.894                                  | 45.22          | < <b>0.001</b> | 3.725                       | 4.063                        |
| Perceived stress          | 15.199                                   | 2.132                                  | 78.67          | < <b>0.001</b> | 2.079                       | 2.185                        |
| Wellbeing                 | 25.045                                   | 5.963                                  | 47.05          | < <b>0.001</b> | 5.715                       | 6.212                        |
| CESD-10                   | 9.015                                    | 1.614                                  | 73.44          | < <b>0.001</b> | 1.571                       | 1.658                        |
| GAD-7                     | 5.746                                    | 1.393                                  | 69.96          | < <b>0.001</b> | 1.354                       | 1.433                        |
| Dog's fearfulness         | 0.068                                    | 0.063                                  | 3.14           | <b>0.003</b>   | 0.024                       | 0.103                        |
| Dog's barking             | 0.004                                    | 0.004                                  | 0.19           | 0.889          | -0.037                      | 0.045                        |
| Dog's stranger aggression | 0.005                                    | 0.005                                  | 0.23           | 0.878          | -0.036                      | 0.045                        |
| Dog's noise sensitivity   | 0.032                                    | 0.027                                  | 1.31           | 0.245          | -0.014                      | 0.068                        |
| Dog's separation behavior | -0.013                                   | -0.012                                 | -0.55          | 0.662          | -0.056                      | 0.032                        |
| Dog's surface phobia      | 0.041                                    | 0.037                                  | 1.74           | 0.111          | -0.005                      | 0.079                        |
| Dog's owner aggression    | 0.004                                    | 0.004                                  | 0.21           | 0.880          | -0.036                      | 0.045                        |
| Dog's dog aggression      | -0.018                                   | -0.018                                 | -0.86          | 0.465          | -0.059                      | 0.023                        |
| Dog's Vas inattention     | -0.003                                   | -0.003                                 | -0.13          | 0.919          | -0.044                      | 0.038                        |
| Dog's Vas impulsivity     | 0.021                                    | 0.021                                  | 1.01           | 0.388          | -0.020                      | 0.061                        |
| PAQ Avoidance             | 0.650                                    | 0.658                                  | 3.41           | <b>0.002</b>   | 0.280                       | 1.036                        |
| PAQ Anxiety               | 0.377                                    | 0.381                                  | 2.48           | <b>0.021</b>   | 0.080                       | 0.682                        |
| Neuroticism               | -0.312                                   | -0.287                                 | -1.75          | 0.109          | -0.608                      | 0.034                        |
| Agreeableness             | 0.479                                    | 0.683                                  | 3.46           | <b>0.002</b>   | 0.296                       | 1.070                        |
| Conscientiousness         | 0.898                                    | 1.100                                  | 21.51          | < <b>0.001</b> | 1.000                       | 1.200                        |
| Extraversion              | 0.137                                    | 0.144                                  | 6.99           | < <b>0.001</b> | 0.104                       | 0.185                        |
| Openness                  | 1.005                                    | 1.199                                  | 42.94          | < <b>0.001</b> | 1.144                       | 1.253                        |
| Owner's gender            | 1.927                                    | 7.403                                  | 28.42          | < <b>0.001</b> | 6.893                       | 7.914                        |
| Owner's age group         | 4.973                                    | 2.056                                  | NA             | NA             | 2.056                       | 2.056                        |
| Children in the household | 0.233                                    | 0.551                                  | NA             | NA             | 0.551                       | 0.551                        |
| Dog's human sociability   | 0.034                                    | 0.035                                  | NA             | NA             | 0.035                       | 0.035                        |
| Dog's perseverance        | -0.016                                   | -0.016                                 | NA             | NA             | -0.016                      | -0.016                       |
| Total wellbeng            | 0.000                                    | 0.000                                  | NA             | NA             | 0                           | 0                            |
| Fear-aggression           | 0.000                                    | 0.000                                  | NA             | NA             | 0                           | 0                            |
| Fear-related behavior     | 0.000                                    | 0.000                                  | NA             | NA             | 0                           | 0                            |
| Aggression                | 0.000                                    | 0.000                                  | NA             | NA             | 0                           | 0                            |
| Impulsivity/inattention   | 0.000                                    | 0.000                                  | NA             | NA             | 0                           | 0                            |

| <b>Variances</b>          |                                 |                               |                |                |                     |                      |
|---------------------------|---------------------------------|-------------------------------|----------------|----------------|---------------------|----------------------|
| <b>Variable</b>           | <b>Unstand-ardized estimate</b> | <b>Stand-ardized estimate</b> | <b>Z-score</b> | <b>P-value</b> | <b>Lower 95% CL</b> | <b>Upper 95 % CL</b> |
| Life satisfaction         | 18.587                          | 0.535                         | 25.01          | <0.001         | 0.493               | 0.577                |
| Perceived stress          | 8.929                           | 0.176                         | 15.83          | <0.001         | 0.154               | 0.197                |
| Wellbeing                 | 4.978                           | 0.282                         | 19.05          | <0.001         | 0.253               | 0.311                |
| CESD-10                   | 6.056                           | 0.194                         | 16.92          | <0.001         | 0.172               | 0.217                |
| GAD-7                     | 5.498                           | 0.323                         | 19.33          | <0.001         | 0.291               | 0.356                |
| Dog's fearfulness         | 0.638                           | 0.549                         | 17.82          | <0.001         | 0.488               | 0.609                |
| Dog's barking             | 0.014                           | 0.014                         | 0.22           | 0.880          | -0.113              | 0.140                |
| Dog's stranger aggression | 0.444                           | 0.492                         | 14.47          | <0.001         | 0.425               | 0.559                |
| Dog's noise sensitivity   | 0.953                           | 0.690                         | 17.01          | <0.001         | 0.610               | 0.769                |
| Dog's separation behavior | 1.036                           | 0.903                         | 27.19          | <0.001         | 0.838               | 0.968                |
| Dog's surface phobia      | 0.972                           | 0.817                         | 22.74          | <0.001         | 0.746               | 0.887                |
| Dog's owner aggression    | 0.737                           | 0.792                         | 19.02          | <0.001         | 0.710               | 0.873                |
| Dog's dog aggression      | 0.654                           | 0.670                         | 16.42          | <0.001         | 0.590               | 0.750                |
| Dog's Vas inattention     | 0.579                           | 0.627                         | 14.83          | <0.001         | 0.544               | 0.710                |
| Dog's Vas impulsivity     | 0.100                           | 0.102                         | 1.19           | 0.300          | -0.067              | 0.272                |
| PAQ Avoidance             | 0.847                           | 0.868                         | 43.54          | <0.001         | 0.829               | 0.907                |
| PAQ Anxiety               | 0.780                           | 0.796                         | 48.97          | <0.001         | 0.764               | 0.828                |
| Neuroticism               | 1.040                           | 0.880                         | 79.94          | <0.001         | 0.858               | 0.901                |
| Agreeableness             | 0.479                           | 0.972                         | 127.79         | <0.001         | 0.957               | 0.987                |
| Conscientiousness         | 0.653                           | 0.980                         | 177.75         | <0.001         | 0.969               | 0.991                |
| Extraversion              | 0.907                           | 1.000                         | NA             | NA             | 1.000               | 1.000                |
| Openness                  | 0.704                           | 1.000                         | NA             | NA             | 1.000               | 1.000                |
| Owner's gender            | 0.068                           | 1.000                         | NA             | NA             | 1.000               | 1.000                |
| Owner's age group         | 5.851                           | 1.000                         | NA             | NA             | 1.000               | 1.000                |
| Children in the household | 0.179                           | 1.000                         | NA             | NA             | 1.000               | 1.000                |
| Dog's human sociability   | 0.947                           | 1.000                         | NA             | NA             | 1.000               | 1.000                |
| Dog's perseverance        | 0.996                           | 1.000                         | NA             | NA             | 1.000               | 1.000                |
| Total wellbeing           | 7.471                           | 0.463                         | 25.27          | <0.001         | 0.427               | 0.498                |
| Fear-aggression           | 0.251                           | 1.000                         | NA             | NA             | 1.000               | 1.000                |
| Fear-related behavior     | 0.428                           | 1.000                         | NA             | NA             | 1.000               | 1.000                |
| Aggression                | 0.194                           | 1.000                         | NA             | NA             | 1.000               | 1.000                |
| Impulsivity/inattention   | 0.344                           | 1.000                         | NA             | NA             | 1.000               | 1.000                |

**Supplementary Table S12.** Unstandardized estimates, standardized estimates, Z-scores, P-values, and 95% confidence limits (CL, for standardized estimates) for intercepts and variances of variables of the SEM model for cat owners, Related to STAR Methods. All P-values are corrected for false discovery rate (FDR). Significant (<0.05) P-values are in bold. CL = confidence limit.

| <b>Intercepts</b>          |                                 |                               |                |                |                     |                     |
|----------------------------|---------------------------------|-------------------------------|----------------|----------------|---------------------|---------------------|
| <b>Variable</b>            | <b>Unstand-ardized estimate</b> | <b>Stand-ardized estimate</b> | <b>Z-score</b> | <b>P-value</b> | <b>Lower 95% CL</b> | <b>Upper 95% CL</b> |
| Life satisfaction          | 22.261                          | 3.439                         | 27.61          | < <b>0.001</b> | 3.195               | 3.683               |
| Perceived stress           | 14.945                          | 2.111                         | 43.38          | < <b>0.001</b> | 2.016               | 2.207               |
| Wellbeing                  | 24.939                          | 5.842                         | 33.25          | < <b>0.001</b> | 5.497               | 6.186               |
| CESD-10                    | 9.054                           | 1.532                         | 38.89          | < <b>0.001</b> | 1.455               | 1.609               |
| GAD-7                      | 5.761                           | 1.316                         | 35.77          | < <b>0.001</b> | 1.244               | 1.389               |
| PAQ Avoidance              | 0.224                           | 0.225                         | 0.76           | 0.529          | -0.354              | 0.803               |
| PAQ Anxiety                | 0.367                           | 0.370                         | 1.52           | 0.169          | -0.107              | 0.846               |
| Neuroticism                | -0.069                          | -0.063                        | -0.21          | 0.881          | -0.655              | 0.529               |
| Agreeableness              | 0.736                           | 1.027                         | 2.89           | <b>0.007</b>   | 0.331               | 1.723               |
| Conscientiousness          | 0.574                           | 0.653                         | 7.36           | < <b>0.001</b> | 0.479               | 0.827               |
| Extraversion               | -0.078                          | -0.083                        | -2.22          | <b>0.041</b>   | -0.157              | -0.010              |
| Openness                   | 1.178                           | 1.414                         | 23.85          | < <b>0.001</b> | 1.297               | 1.530               |
| Cat's fearfulness          | 0.124                           | 0.127                         | 3.67           | < <b>0.001</b> | 0.059               | 0.195               |
| Cat's human aggression     | -0.080                          | -0.093                        | -2.39          | <b>0.026</b>   | -0.170              | -0.017              |
| Cat's activity playfulness | 0.003                           | 0.004                         | 0.10           | 0.940          | -0.066              | 0.074               |
| Cat's cat sociability      | 0.020                           | 0.022                         | 0.60           | 0.634          | -0.049              | 0.093               |
| Cat's human sociability    | 0.015                           | 0.015                         | 0.42           | 0.751          | -0.055              | 0.086               |
| Cat's litterbox issues     | -0.048                          | -0.052                        | -1.40          | 0.208          | -0.126              | 0.021               |
| Cat's excessive grooming   | 0.005                           | 0.005                         | 0.14           | 0.919          | -0.064              | 0.074               |
| Owner's gender             | 1.912                           | 6.766                         | 17.47          | < <b>0.001</b> | 6.007               | 7.525               |
| Owner's age group          | 4.659                           | 1.958                         | NA             | NA             | 1.958               | 1.958               |
| Children in the household  | 0.137                           | 0.399                         | NA             | NA             | 0.399               | 0.399               |
| Total wellbeing            | 0.000                           | 0.000                         | NA             | NA             | 0.000               | 0.000               |
| <b>Variances</b>           |                                 |                               |                |                |                     |                     |
| <b>Variable</b>            | <b>Unstand-ardized estimate</b> | <b>Stand-ardized estimate</b> | <b>Z-score</b> | <b>P-value</b> | <b>Lower 95% CL</b> | <b>Upper 95% CL</b> |
| Life satisfaction          | 20.618                          | 0.492                         | 13.73          | < <b>0.001</b> | 0.422               | 0.562               |
| Perceived stress           | 10.657                          | 0.213                         | 9.77           | < <b>0.001</b> | 0.170               | 0.255               |
| Wellbeing                  | 4.546                           | 0.249                         | 11.60          | < <b>0.001</b> | 0.207               | 0.292               |
| CESD-10                    | 6.135                           | 0.176                         | 9.12           | < <b>0.001</b> | 0.138               | 0.213               |
| GAD-7                      | 6.603                           | 0.345                         | 10.98          | < <b>0.001</b> | 0.283               | 0.406               |
| PAQ Avoidance              | 0.950                           | 0.956                         | 63.51          | < <b>0.001</b> | 0.926               | 0.985               |
| PAQ Anxiety                | 0.635                           | 0.645                         | 20.49          | < <b>0.001</b> | 0.583               | 0.706               |
| Neuroticism                | 0.995                           | 0.819                         | 33.85          | < <b>0.001</b> | 0.772               | 0.867               |
| Agreeableness              | 0.509                           | 0.991                         | 107.75         | < <b>0.001</b> | 0.973               | 1.009               |
| Conscientiousness          | 0.720                           | 0.931                         | 53.09          | < <b>0.001</b> | 0.897               | 0.966               |

|                            |       |       |       |        |       |       |
|----------------------------|-------|-------|-------|--------|-------|-------|
| Extraversion               | 0.874 | 1.000 | NA    | NA     | 1.000 | 1.000 |
| Openness                   | 0.695 | 1.000 | NA    | NA     | 1.000 | 1.000 |
| Cat's fearfulness          | 0.956 | 1.000 | NA    | NA     | 1.000 | 1.000 |
| Cat's human aggression     | 0.729 | 1.000 | NA    | NA     | 1.000 | 1.000 |
| Cat's activity playfulness | 0.931 | 1.000 | NA    | NA     | 1.000 | 1.000 |
| Cat's cat sociability      | 0.881 | 1.000 | NA    | NA     | 1.000 | 1.000 |
| Cat's human sociability    | 0.951 | 1.000 | NA    | NA     | 1.000 | 1.000 |
| Cat's litterbox issues     | 0.853 | 1.000 | NA    | NA     | 1.000 | 1.000 |
| Cat's excessive grooming   | 0.978 | 1.000 | NA    | NA     | 1.000 | 1.000 |
| Owner's gender             | 0.080 | 1.000 | NA    | NA     | 1.000 | 1.000 |
| Total wellbeing            | 9.739 | 0.458 | 15.86 | <0.001 | 0.401 | 0.514 |
| Owner's age group          | 5.664 | 1.000 | NA    | NA     | 1.000 | 1.000 |
| Children in the household  | 0.117 | 1.000 | NA    | NA     | 1.000 | 1.000 |

**Supplementary Table S13.** Sample Items of the Dog Personality and Unwanted Behaviour Factors, Related to STAR Methods.

| Section                   | Factor                                                           | Sample item                                                                                                                                       |
|---------------------------|------------------------------------------------------------------|---------------------------------------------------------------------------------------------------------------------------------------------------|
| <b>Personality</b>        | Insecurity                                                       | "Insecure: Interested but fearful and uneasy towards new things, vacillates between approach and withdrawal. May need encouragement from people." |
|                           | Training focus                                                   | "Focused: Is focused on what it is doing despite external stimuli"                                                                                |
|                           | Energy                                                           | "Active: Moves about a lot, spends little time idle"                                                                                              |
|                           | Aggressiveness/dominance                                         | "Dominant: Is overbearing and/or threatening towards other dogs"                                                                                  |
|                           | Human sociability                                                | "Affectionate (with people): Seeks physical closeness with people. For example, sleeps or relaxes next to people or on their lap, begs petting"   |
|                           | Dog sociability                                                  | "Playful (with dogs): Initiates and engages to play with other dogs"                                                                              |
| <b>Unwanted behaviour</b> | Perseverance                                                     | "Persevering: Tends to continue in a course of action for a long time, does not give up"                                                          |
|                           | Noise sensitivity                                                | "When hearing fireworks, my dog escapes".                                                                                                         |
|                           | Fearfulness                                                      | "When meeting a stranger my dog withdraws"                                                                                                        |
|                           | Fear of surfaces or heights                                      | "Does your dog have difficulties to walk on a metal grid?"                                                                                        |
|                           | Separation anxiety                                               | "The dog pants when the owner is leaving"                                                                                                         |
|                           | Impulsivity                                                      | "My dog does not think before she/he acts (e.g., would steal food without first looking to see if someone is watching)"                           |
|                           | Inattention                                                      | "It's difficult for my dog to concentrate on a task or play."                                                                                     |
|                           | Barking                                                          | "The dog barks when the doorbell rings or the door is knocked"                                                                                    |
|                           | Stanger directed aggression                                      | "When a stranger tries to pet the dog outside the home and the dog is on a leash, my dog tries to snap or bite the stranger"                      |
|                           | Owner directed aggression                                        | "When the owner/family member takes a bone/food/toy from the dog, she/he tries to snap or bite"                                                   |
| Dog directed aggression   | "When my dog meets an unfamiliar dog, my dog tries to attack it" |                                                                                                                                                   |

**Supplementary Table S14.** Sample Items of the Cat Personality and Unwanted Behaviour Factors, Related to STAR Methods.

| Section            | Factor                    | Sample item                                                                             |
|--------------------|---------------------------|-----------------------------------------------------------------------------------------|
| Personality        | Fearfulness               | “Escapes or hides from unfamiliar people”                                               |
|                    | Activity/ playfulness     | “Stalks, chases, or pounces on moving objects (e.g., string, balls, soft toys)”         |
|                    | Aggression toward humans  | “Attempts to scratch or bite when his/her nails are clipped”                            |
|                    | Sociability toward humans | “Often seeks out physical contact from people, nudges or nuzzles”                       |
|                    | Sociability toward cats   | “Seeks company of other cats in the household”                                          |
| Unwanted behaviour | Excessive grooming        | “Shows excessive and intensive grooming (inhibits other behaviours) throughout the day” |
|                    | Litterbox issues          | “Urinate (crouching position) in inappropriate places”                                  |

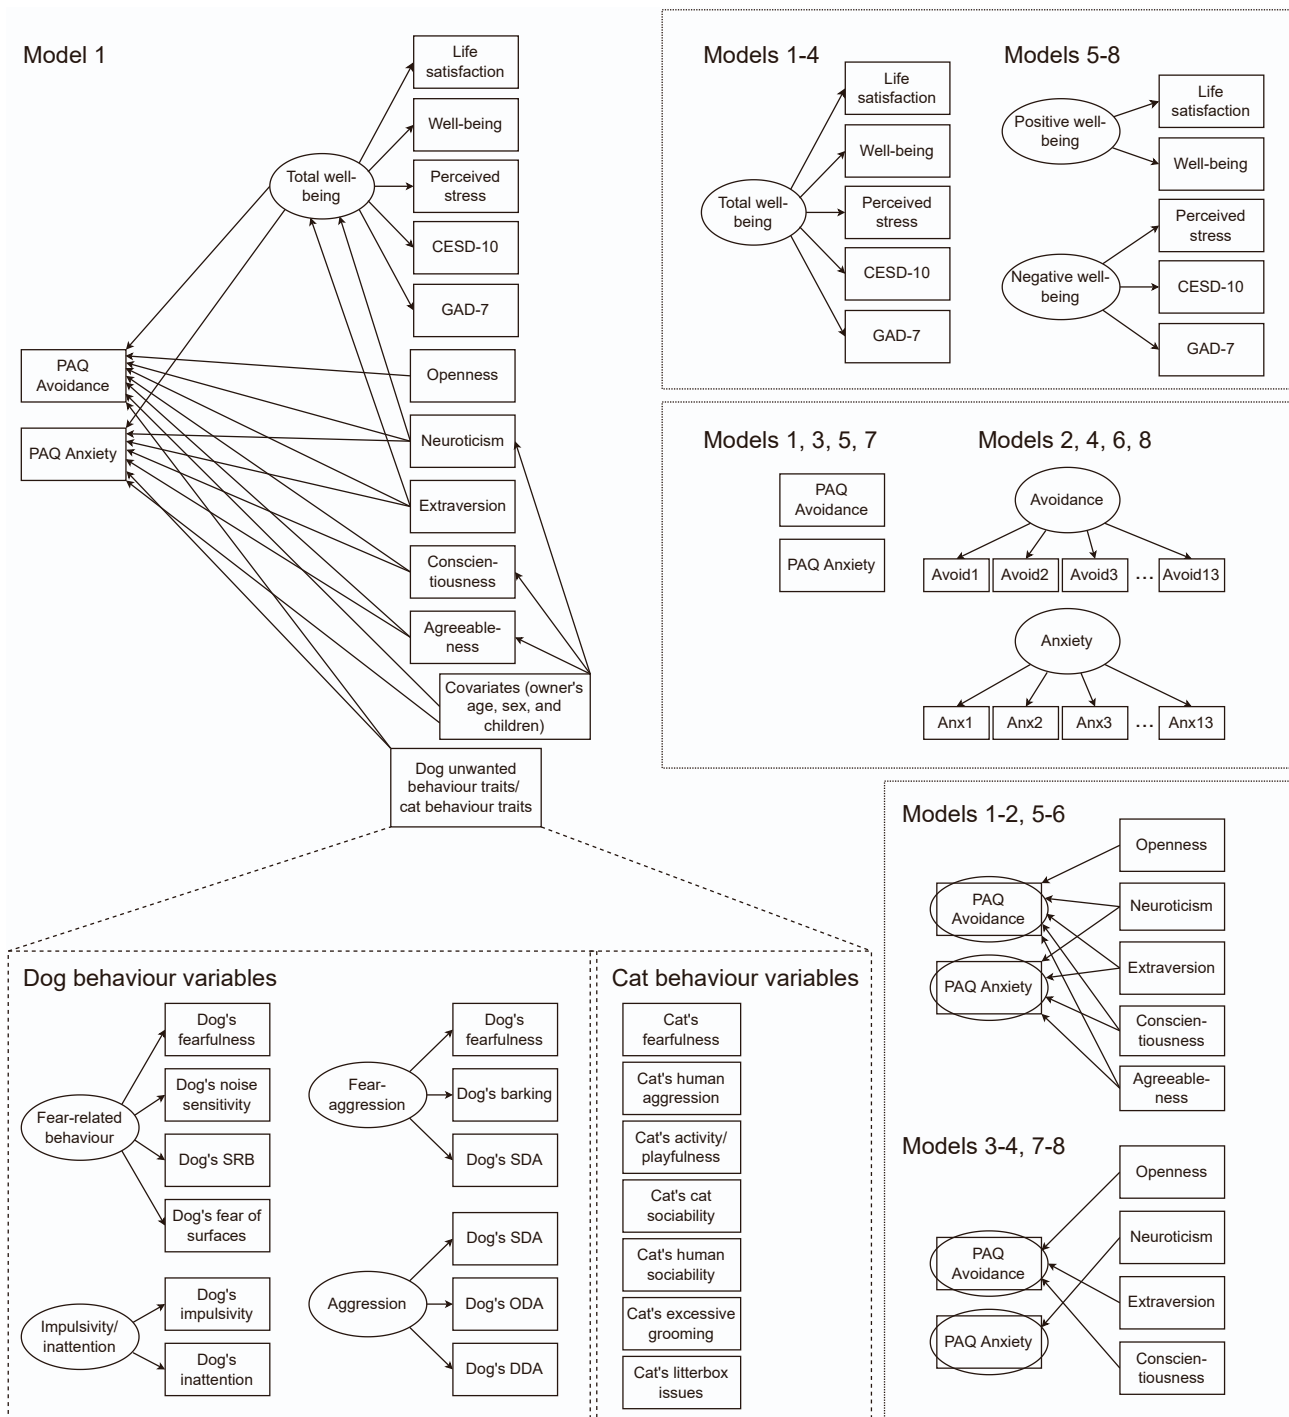

**Supplementary Figure S1.** Competing models, Related to STAR Methods. Regressions and latent variables of model 1 are shown as an example. Models 1-4 included one latent well-being variable (total well-being) and models 5-8 included two latent well-being variables (positive well-being and negative well-being). Models 1, 3, 5, and 7 utilized original pet attachment scores and models 2, 4, 6, and 8 utilized latent attachment variables. Models 1-2 and 5-6 included more regressions from owner personality traits to attachment scales/latent variables, and models 3-4 and 7-8 included fewer regressions. Competing models were identical in dog and cat owners, except those models of dog owners included latent unwanted dog behavioural traits and models of cat owners included cat behavioural traits.



## Supplemental references

1. [S2] Zilcha-Mano, S., Mikulincer, M., & Shaver, P. R. (2011). An attachment perspective on human–pet relationships: Conceptualization and assessment of pet attachment orientations. *Journal of Research in Personality*, 45(4), 345-357. 10.1016/j.jrp.2011.04.001.
